24 compounds with polyalcohols, lipids, and amines. The common morphology and chemistry  
25 of the glandular trichomes suggests an analogous response to similar environmental  
26 conditions in these evolutionary distant montane monkeyflowers.

27

28 **Keywords:** Glandular trichome, Secretions, Morphology, Histochemistry, TLC stains,  
29 *Mimulus*

30

### 31 **1. Introduction**

32 Trichomes are small hairlike structures that protrude from the epidermis of above-ground  
33 vegetative and reproductive tissue (Theobald et al., 1979; Holeski et al., 2013). Leaf trichome  
34 morphology, function, and density varies considerably across individuals, populations, and  
35 species (Kärkkäinen and Ågren, 2002; Dalin et al., 2008). Nearly one third of all vascular  
36 plants contain glandular trichomes, which often cooccur with non-glandular trichomes on the  
37 same plant (Holeski et al. 2010; Huchelmann et al. 2017). Glandular trichomes are capable of  
38 excreting secondary metabolites that may serve a variety of defensive and physiological roles  
39 that contribute to plant fitness (Payne, 1973; Ehleringer, 1984; Wagner, 1991; Agren and  
40 Schemske, 1993; Kärkkäinen and Ågren, 2002; Wagner et al., 2004; Schillmiller et al., 2008;  
41 Holeski et al., 2010, 2013; Meira et al., 2014; Huchelmann et al., 2017; Tissier et al., 2017;  
42 Liu et al., 2019). These secretory structures display high morphological and chemical  
43 diversity across the plant kingdom, including variation in the length of the trichome stalk cell  
44 relative to the size of the glandular head (Theobald et al., 1979). For example, capitate  
45 trichomes have a stalk cell twice as long as their multicellular head, and can serve as physical  
46 barriers to increase the leaf boundary layer, thereby regulating leaf temperature and water

47 loss (Theobald et al., 1979; Ehleringer, 1984; Körner, 2003; Glas et al., 2012; Liu et al.,  
48 2019). Trichomes may protect tissues from extreme temperatures by reducing heat damage,  
49 controlling transpiration, increasing freeze-tolerance, and protecting against damage by UV  
50 light (Ehleringer, J., 1984; Gravano et al., 1998; Werker, 2000; Larcher, 2001; Kärkkäinen  
51 and Ågren, 2002; Körner, 2003; Wagner et al., 2004; Combrinck et al., 2007; Huttunen et al.,  
52 2010; Mershon et al., 2015). Further, glandular trichome secretions can have important roles  
53 in pollination, seed dispersion, and inter-plant signaling (Levin, 1973; Wagner, 1991;  
54 Holeski et al., 2010; Kärkkäinen and Ågren, 2002; Schillmiller et al., 2008; Holeski et al.,  
55 2013; Meira et al., 2014; Tissier et al., 2017; Liu et al., 2019). Some leaf trichomes protect  
56 plants from herbivory by secreting fluids that interfere with insect activity (Levin, 1973;  
57 Wagner, 1991; Agren and Schemske, 1993; Elle and Hare, 2000; Malakar and Tingey, 2000;  
58 Handley et al., 2005; Holeski et al., 2010; Kärkkäinen and Ågren, 2002; Schillmiller et al.,  
59 2008; Holeski et al., 2013; Meira et al., 2014; Tissier et al., 2017; Liu et al., 2019). Trichome  
60 secretions that possess antifungal, antibiotic, and antithrombotic properties can also defend  
61 the plant from pathogens (Dos Santos Tozin and Rodrigues, 2017; Haratym and Weryszko-  
62 Chmielewska, 2017; Tissier et al., 2017; Liu et al., 2019). Indeed, secretions from several  
63 plant species have been harvested for pharmacological studies as possible alternatives to  
64 conventional synthetic antibiotics (Liu et al., 2019). The molecular characteristics of the  
65 trichome secretion compounds, such as terpenes and acyl sugars, dictate their function  
66 (Gershenzon and Dudareva, 2007; Schillmiller et al., 2008; Huchelmann et al., 2017; Liu et  
67 al., 2019).

68

69 The genus *Mimulus* (Phrymaceae, updated to *Erythranthe* by Barker et al., 2012; but see  
70 Lowry et al. in press) contains 160-200 species that exhibit tremendous phenotypic variation,  
71 and has served as a model system for ecological adaptation, speciation, and chromosomal  
72 evolution (Wu et al., 2008; Yuan, 2019). In this study, we compare trichome morphology and  
73 function of two distantly related species of monkeyflowers, *Mimulus lewisii* (section  
74 *Erythranthe*) and *M. tilingii* (section *Simiolus*; Beardsley et al., 2004). These two species  
75 exhibit substantial range overlap that encompasses montane environments in western North  
76 America, likely experience similar environmental conditions, and are characterized by  
77 glandular trichomes (Greene, 1895; Schnepf and Busch, 1976; Abrams, 1984; Bohm, 1992;  
78 Baldwin et al., 2012.)

79

80 Here we performed a comparative analysis of the vegetative glandular trichome morphology  
81 and secretion histochemistry of *Mimulus lewisii* and *M. tilingii*. We examined morphology  
82 using both light microscopy and scanning electron microscopy (SEM; Ascensão and Pais,  
83 1998; Haratym and Weryszko-Chmielewska, 2017; Rodriguez et al., 2018). We used  
84 histochemical tests to elucidate categories of compounds found in the glandular secretions  
85 from each species and used TLC to identify the functional groups of the compounds in the  
86 secretions. We ask whether the ecological overlap in the range of these two species is  
87 reflected in similar trichome structure and function, in spite of their evolutionary distance  
88 (Beardsley et al., 2004; Nie et al., 2006).

89

## 90 **2. Material and Methods**

### 91 **2.1. Plant materials**

92 Plants used in this study originated from field-collected lineages centrally-located within the  
93 geographic range of each species. Seeds from a *Mimulus lewisii* population in the south-  
94 central Oregon, USA, portion of the Modoc Plateau were provided by Paul Beardsley, and  
95 belong to the northern race of *M. lewisii* (Heisey et al., 1971; Beardsley et al., 2004; Baldwin  
96 et al., 2012). *Mimulus tilingii* seeds were collected from a population in the White Mountains  
97 in Inyo County, California, USA (N 37°12.720' and W 118°36.627'). For both species, we  
98 propagated the lineages through self-fertilization for three generations in the greenhouse to  
99 reduce maternal effects. Seeds were planted in Fafard 4P potting soil, stratified at 4°C for 7  
100 days, then germinated and maintained in a walk-in custom-built growth chamber  
101 (Environmental Growth Chambers, Chagrin Falls, Ohio, USA) under long-day photoperiod  
102 conditions (16h light at 22°C/8 h dark at 18°C) and 50% relative humidity. Plants were  
103 watered daily to soil saturation, with Peters Professional 20-15-20 fertilizer at 300 ppm added  
104 weekly. We sampled vegetative material from leaves, stems, and sepals plants that were in  
105 full bloom.

106

## 107 **2.2. Morphology and distribution of glandular trichomes**

108 To study the morphological features of trichomes in these species, we used multiple  
109 complementary microscopy techniques to obtain a thorough characterization of their  
110 structure.

111

### 112 **2.2.1. Light microscopy**

113 We imaged the glandular trichomes using temporary wet mounts. Fresh leaf tissue was  
114 collected from the edge of mature leaves using a razor blade, cut into ca. 5 mm<sup>2</sup> pieces, and

115 placed on a slide with a droplet of distilled water. Photomicrographs of wet mount leaves  
116 were made with a Nikon CoolPix 990 digital camera fitted with a Martin Microscope S/N  
117 0120 adapter on a Nikon Optiphot compound light microscope and Nikon SMZ10 dissecting  
118 microscope.

119

### 120 **2.2.2. Trichome density**

121 We calculated trichome density on both abaxial and adaxial leaf surfaces for both species  
122 from the light micrographs. Trichomes were counted at 4.9X magnification under a  
123 dissecting microscope, and trichome density was calculated using FIJI software (Schindelin  
124 et al., 2012) on the adaxial (*M. lewisii* n=7; *M. tilingii* n=6) and the abaxial (*M. lewisii* n=5;  
125 *M. tilingii* n=6) surfaces. The densities between species and between the leaf surfaces were  
126 compared with two-sample t-tests.

127

### 128 **2.2.3. Scanning Electron Microscopy (SEM)**

129 To examine the three dimensional structure of trichomes, we captured images using SEM.  
130 Following the protocol of Talbot and White (2013), 17 subsections of *Mimulus lewisii* and 11  
131 subsections of *M. tilingii* leaves (5 mm x 5 mm each) were fixed in 100% methanol for 25  
132 min at room temperature. Subsequently, the plant material was dehydrated twice in 100%  
133 ethanol for 30 min. Once dehydrated, the samples were critical-point dried in an EMS 850  
134 Critical Point Dryer, and sputter coated with gold-palladium following manufacturer's  
135 protocols for the Denton Desk IV sputter coater. The adaxial and abaxial leaf surfaces were  
136 imaged under a JOEL JSM-6360LV scanning electron microscope at 10kV accelerating  
137 voltage.

138

### 139 **2.3. Secretion Chemistry**

140 To characterize chemical characteristics of the trichome glandular secretions, we used  
141 histochemical techniques and other staining processes following thin layer chromatography  
142 (TLC). The glandular secretions for *Mimulus lewisii* and *M. tilingii* were analyzed with  
143 staining techniques both *in vivo* on the trichomes and *in vitro* after isolating the secretions  
144 from the leaves.

145

#### 146 **2.3.1. Histochemistry**

147 The main classes of metabolites present in *Mimulus lewisii* and *M. tilingii* leaf glandular  
148 secretions were determined using protocols from Haratym and Weryszko-Chmielewska  
149 (2017) for the following histochemical tests: potassium dichromate for tannins (Gabe, 1968),  
150 Toluidine Blue O for polysaccharides (Serrato-Valenti et al., 1997), Ruthenium Red for  
151 polysaccharides that are not cellulose (Johansen, 1940), Nile Blue for acidic and neutral  
152 lipids (Jensen, 1962), Sudan Black B and Sudan III for lipids (Johansen, 1940; Lison, 1960),  
153 and Neutral Red for essential oils and lipids (Clark, 1981). All stains were matched with an  
154 unstained control. We imaged freshly stained tissue following the light microscopy  
155 techniques described previously (Section 2.2.1) on a Nikon Eclipse E600 microscope.

156

#### 157 **2.3.2. Extraction and isolation of secretions**

158 *Mimulus lewisii* and *M. tilingii* trichome secretions were isolated from plant tissue using 95%  
159 ethanol leaf washes. Leaf washes allow isolation of the trichome secretions without  
160 disrupting the leaf integrity (Asai et al., 2012). After optimizing the method from Asai et al.

161 (2012), each freshly-collected leaf was rinsed for 15 seconds. To obtain sufficient material  
162 for subsequent analyses, 699 individual leaf washes of *Mimulus lewisii* were pooled together,  
163 as well as 500 leaf washes for *M. tilingii*. After removing the solvent with a Buchi Rotavapor  
164 R-210, secretions were resuspended in ethyl acetate. To screen for functional groups, we  
165 spotted the secretions on thin layer chromatography (TLC) silica plates prior to exposure to  
166 the staining solutions. Plates were visualized following standard procedures from Tuchstone  
167 (1992), including: UV light only for conjugated pi-systems; vanillin-sulfuric acid for  
168 alcohols, ketones, bile acids, and steroids; phosphomolybdic acid for steroids and lipids;  
169 cerium ammonium molybdate for polyalcohols; potassium permanganate for alkenes,  
170 alkynes, alcohols, and amines; p-anisaldehyde for polysaccharides; ninhydrin for amines;  
171 diphenylamine in EtOH for nitrate esters; copper(II) sulfate for sulfur containing glycosides;  
172 and 2, 4-dinitrophenylhydrazine for aldehydes and ketones.

173

### 174 **3. Results**

#### 175 **3.1. Morphology and distribution of glandular trichomes**

176 Both *Mimulus lewisii* and *M. tilingii* leaves possess predominantly capitate glandular  
177 trichomes on the adaxial and abaxial surfaces (Figs. 1 and 2).

178

##### 179 **3.1.1. Trichome density and relative size**

180 In both species, trichomes were distributed regularly across the leaf surface (Figs. 2A and  
181 3A). However, trichome density was nearly twice as high in *Mimulus tilingii* (mean  $\pm$  SE  
182  $35.5 \pm 2.30$  trichomes per  $\text{mm}^2$ ) than in *M. lewisii* ( $17.4 \pm 1.17$  trichomes per  $\text{mm}^2$ ; two-  
183 sample t-test,  $n = 24$ ,  $df = 22$ ,  $t = -6.99$ ,  $p < 0.001$ ), with no significant difference between



184 abaxial and adaxial leaf surfaces within a given species (Table 1; two-sample t-test, each  
185  $n=12$ ,  $df=10$ , *M. lewisii* contrast  $t= 0.81$  and *M. tilingii* contrast  $t= -0.37$ ; both  $p > 0.05$ ).  
186 Qualitatively, the trichomes appeared overall longer, though more variable in length, in *M.*  
187 *lewisii* than in *M. tilingii* (Fig. 1).

188

### 189 **3.1.2. Trichome types**

190 The glandular trichomes on *Mimulus lewisii* and *M. tilingii* show extensive morphological  
191 similarity (Fig. 1). Leaves from both species contain capitate trichomes with a single cell  
192 stalk, a unicellular neck, and a multicellular head that is surrounded by a cuticle containing  
193 the secretory compounds (Figs. 1 and 2). Trichomes with these characteristics are generally  
194 classified at type VI (Luckwill, 1943; Channarayappa et al., 1992; Glas et al., 2012).

195

196 *Mimulus lewisii* glandular trichomes are long projecting structures from the epidermal  
197 surfaces, with consistent density and morphology across all the tissue examined. In SEM  
198 micrographs of *M. lewisii*, the whole trichome surfaces have smooth surfaces (Fig. 2B-E).  
199 Most trichomes had a single basal cell, although occasionally larger trichomes appeared to  
200 have more than one basal cell (Fig. 1B). In all samples analyzed, the stalks and the necks  
201 were single cells (Figs. 1B, C and 2B, D, E). Within each species, the length of the stalk cell  
202 was the most variable component of the trichomes (Figs. 1B, C and 2A, F). The heads  
203 contained 2-4 cells arranged in a single plane, which could be observed through SEM only  
204 after the cuticle was removed in the fixation process (Fig. 2B-E). We could also observe the  
205 multicellular heads with the compound light microscope, which revealed the cuticle with the  
206 secretions above or surrounding the cells (Fig. 1B,C).

207

208 *Mimulus tilingii* glandular trichomes also have consistent density and morphology across the  
209 leaf surface, although they appeared generally shorter than *M. lewisii* trichomes. SEM  
210 micrographs showed trichomes that were minutely verrucose and, like *M. lewisii*, had a  
211 single basal cell (Fig. 2G-I). As in *M. lewisii*, the *M. tilingii* trichomes varied in height  
212 primarily due to varied lengths of the stalk cells (Figs. 1C and 2F). *Mimulus tilingii*  
213 trichomes also had a single neck cell that was thinner than the head and the stalk (Figs. 1C-D  
214 and 2H). We consistently observed tetracellular heads in the glandular trichomes of *M.*  
215 *tilingii* (Fig. 2G-I). In some of the SEM images, the secretions were still visible on the  
216 trichome heads despite the harsh dehydration process (Fig. 2G-I). Some light microscopy  
217 images showed the cuticle with the subcuticular secretions, consistent with secretions being  
218 released following cuticle rupture (Fig. 3P).

219

## 220 **3.2. Histochemical analysis**

### 221 **3.2.1. *In vivo* analysis**

222 Histochemical staining revealed numerous substances in trichome secretions of both *Mimulus*  
223 *lewisii* and *M. tilingii* (Table 2). Fresh unstained sections appeared transparent both species  
224 (Fig. 3A, I). Trichome secretions stained positively for polysaccharides and lipids, but did  
225 not stain for tannins (Fig. 3). No substantial staining of tannins was observed in the  
226 secretions with potassium dichromate treatment, but the cell walls appear darker (Fig. 3B, J).  
227 A high polysaccharide concentration was visible in the head cells of both with Toluidine  
228 Blue O (Fig. 3C, K), and was also observed in the stalk cell of *M. lewisii* (Fig. 3C).  
229 Ruthenium Red treatment also indicated polysaccharides in the secretions of the two species

230 (Fig. 3D, L). Both species were positive for acid lipids based on staining with Nile Blue (Fig.  
231 3E, M), and positive for lipids when stained with Sudan Black B, Sudan III, and Neutral Red  
232 (Fig. 3F-H, N-P). When treated with Sudan III, only small lipidic vesicles were visible in  
233 both species (Fig. 3G, O). While Neutral Red stains the head cells of both species, *M. tilingii*  
234 shows higher lipidic concentrations in the surrounding secretions based on stain intensity  
235 (Fig. 3H, P).

236

### 237 **3.2.2. Thin layer chromatography**

238 *Mimulus lewisii* and *M. tilingii* leaf glandular secretions responded positively to all tests for  
239 functional groups within the compounds we examined (Table 3). When *M. lewisii* and *M.*  
240 *tilingii* glandular secretions were spotted on TLC plates and exposed to short-wave UV light,  
241 the spots from both species fluoresced, indicating the presence of conjugated pi systems in  
242 the compounds. Vanillin-sulfuric acid tested positive for alcohols, ketones, bile acids or  
243 steroids for both species, though coloration was darker in *M. lewisii*. Steroids, lipids and  
244 antioxidants were also present in the secretory compounds, as evidenced by spots in  
245 phosphomolybdic acid. Polyalcohols were positively characterized with cerium ammonium  
246 molybdate. Potassium permanganate stained the glandular secretions from both species for  
247 alkenes, alkynes, alcohols, and amines, suggesting the presence of double bonded  
248 components. The stain for sugars, p-anisaldehyde, were darkly spotted. Staining with  
249 ninhydrin indicated low amounts of amines in the secretions for both *M. lewisii* and *M.*  
250 *tilingii*. Nitrate esters were also weakly detected as indicated by yellow spots on  
251 diphenylamine in EtOH. Copper (II) sulfate lightly stained for sulfur containing glycosides.  
252 Finally, the orange spots on the 2, 4-dinitrophenylhydrazine stained plate confirmed the

253 presence of aldehydes and ketones. Overall, the compounds of both species appear to contain  
254 alcohols, lipids, alkynes, sugars, amines, nitrate esters, and some sulfur-containing  
255 glycosides.

256

#### 257 **4. Discussion**

258 We determined that two distantly-related montane monkeyflower species, *Mimulus lewisii*  
259 and *M. tilingii*, both contain type VI glandular trichomes on vegetative tissues that are  
260 characterized by a stalk cell, a neck cell and a multicellular head that produce lipids and  
261 polysaccharides. This structure is consistent with the only prior morphological  
262 characterization in *M. tilingii* of which we are aware (Schnepf and Busch, 1976) that  
263 identified a tetracellular trichome head using light microscopy, and is similar to the straight,  
264 unicellular trichomes described in the closely related species *M. guttatus* (Holeski 2007;  
265 Holeski et al. 2010).

266

267 Capitulate trichome morphologies have been classified into eight categories, largely based on  
268 the number of cells, length, and shape (Luckwill, 1943; Channarayappa et al., 1992; Glas et  
269 al., 2012). The trichome morphology of both *Mimulus* species studied here are consistent  
270 with type VI, which have a single stalk cell, a neck cell, and a multicellular head within the  
271 same plane (Luckwill, 1943; Channarayappa et al., 1992; Glas et al., 2012). Most trichomes  
272 observed in *M. lewisii* are bicellular or tricellular in the glandular head, while *M. tilingii* have  
273 primarily tetracellular heads, consistent with descriptions by Schepf and Busch (1976). Other  
274 montane species, *Solanum lycopersicum* and *S. tuberosum*, also have type VI glandular  
275 trichomes with tetracellular heads (Kang et al., 2010; Bergau et al., 2015; Cho et al., 2017).

276 The presence of a cuticle protecting the secretions in the subcuticular space of the trichomes  
277 that we observed in *M. lewisii* and *M. tilingii* was also identified in *S. lycopersicum* and *S.*  
278 *tuberosum*, suggesting this structure could function to sequester and store the secretions until  
279 a physical disturbance, such as water droplets or insect visitation, causes the cuticle to  
280 rupture (Tissier et al., 2017). This extracellular structure thus may prevent intracellular  
281 accumulation and self-toxicity (Tissier et al., 2017).

282

283 Trichome length, size, and density have been found to vary in response to the environment  
284 factors in dicotyledonous angiosperms (Theobald et al., 1979; Malakar and Tingey, 2003;  
285 Holeski, 2007; Holeski et al. 2010). In species such as *Potentilla glandulosa* growing in the  
286 Sierra Nevada mountains, trichome density decreases with altitude, which was attributed to  
287 responses to herbivory and oviposition, rather than elevational factors (Levin, 1973). In other  
288 systems , however, decreased trichome density with altitude has been proposed as a response  
289 to a reduced number of herbivores present in the higher ranges, such that the resources can be  
290 allocated elsewhere (Wilkens et al., 1996; Kofidis and Bosabaldis, 2008; Horgan et al.,  
291 2009). In contrast, trichome density has been reported to increase with altitude in potatoes  
292 (Horgan et al., 2009), tomatoes (Wilkens et al., 1996), and salva-de-marajó (Tozin et al.,  
293 2015). Among perennial coastal *M. guttatus* populations, average trichome density also  
294 varies with elevation. Holeski (2007) suggested density changes inversely with elevation as a  
295 response to herbivory, and also shows phenotypic plasticity. It is possible that, like *Mimulus*  
296 *guttatus*, *M. lewisii* and *M. tilingii* may exhibit plasticity in trichome density, largely in  
297 response to herbivory (Holeski, 2007; Holeski et al., 2010), although future studies are  
298 needed. Additionally, although our study did not include density measurements between

299 populations, we suspect that the trichome density in *M. lewisii* and *M. tilingii* could have  
300 other functionalities beyond herbivore defense.

301

302 Trichomes tend to be precocious structures that develop before the leaf fully matures  
303 (Rodriguez et al., 2018). As leaf maturation proceeds, intercalary growth increases the  
304 average distance between trichomes, such that greater intercalary growth produces a larger  
305 leaf with reduced trichome density (Rodriguez et al., 2018). We hypothesize that mature  
306 leaves of *M. lewisii*, which are larger than those of *M. tilingii*, may have lower trichome  
307 density in part because of such greater intercalary growth. Interestingly, we found that the  
308 trichome density did not differ significantly between the adaxial and abaxial surfaces within  
309 each species, yet other studies have reported density variation between the opposing leaf  
310 surfaces in other species (Bergau et al., 2015; Rodriguez et al., 2018). For example, in the  
311 fern *Notholanea sulphurea*, trichomes in the adaxial surface are only present in younger  
312 plants, purportedly for protection during early developmental stages (Ascensão et al., 1995;  
313 Werker, 2000; Rodriguez et al., 2018).

314

315 Trichome secretions of both monkeyflower species contained polysaccharides and lipids, but  
316 no tannins. Polysaccharides are common secretory compounds for external defense in several  
317 other species, including *Marriubium vulgare* and *Notholaena sulphurea* (Schmilmiller et al.,  
318 2008; Keefover-Ring et al., 2014; Haratym and Weryszko-Chmielewska, 2017; Rodriguez et  
319 al., 2018; Liu et al., 2019). Additionally, the presence of lipophilic compounds has been  
320 widely described in glandular secretions of numerous species, especially terpenoids and  
321 flavonoids (Asai et al., 2012; Liu et al., 2019). For instance, terpenoids are a common lipidic

322 compound category, which are biosynthetically derived from five-carbon rings, such as  
323 salvorin A and (-)-menthol (Liu et al., 2019). Additionally, flavonoids are also commonly  
324 present in glandular trichomes secretions across numerous species (Wollenweber and  
325 Schneider, 2000; Kang et al., 2010; Haratym and Weryszko-Chmielewska, 2017; Rodriguez  
326 et al., 2018; Liu et al., 2019). Bohm (1992) characterized the secondary chemistry of the  
327 entire leaf in *M. lewisii* and described several flavonoids, but these were not present in our  
328 analysis of the trichome secretions of either *Mimulus* species. Because we instead  
329 specifically isolated external trichome secretions, this divergence in flavonoid detection  
330 between our study and that of Bohn (1992) suggests separate metabolic pathways or  
331 metabolic packaging in the production of internal compounds and those that are excreted  
332 through the trichomes.

333

334 Polysaccharides are present in the secretory products from both *Mimulus* species. Consistent  
335 with our positive Toluidine Blue O staining, Schnepf and Busch (1976) hypothesized that the  
336 secretions of *M. tilingii* contain carbohydrates based on their observations of Golgi bodies in  
337 the trichome head cells. Interestingly, the polysaccharides in the secretions of *M. lewisii* were  
338 present in the head cell as well as the stalk cell, which suggests certain compounds are  
339 produced in the Golgi of stalk cells, then transported to the multicellular head prior to  
340 secretion. It is possible that the polysaccharides stained are precursors of lipidic compounds,  
341 which have been suggested to play a role in environmental stress response (Schillmiller et al.,  
342 2008). The high concentrations of lipids in the glandular heads of both *M. lewisii* and *M.*  
343 *tilingii* suggests that they are produced in the trichome head primarily for secretion, as  
344 compounds produced in the trichomes are generally not transported back to the rest of the

345 plant because they can often be hazardous to its internal metabolism (Schillmiller et al., 2008;  
346 Tissier et al., 2017). Furthermore, the TLC plate spotting of the isolated glandular secretions  
347 revealed a variety of functional groups present in both species including alcohols, lipids,  
348 alkynes, sugars, amines, nitrate esters, and some sulfur-containing glycosides. Many studies  
349 have found these functional groups in terpenes, a common natural product biosynthesized  
350 from five-carbon compounds (Gershenzon and Dudareva, 2007; Huchelmann et al., 2017;  
351 Liu et al., 2019). Secretions from both species have conjugated pi systems which also  
352 correspond with terpenoids (Schillmiller et al., 2008). Terpenes are commonly synthesized by  
353 similar capitate trichomes across several species such as tomatoes (Schillmiller et al., 2008).  
354 Additional characterization of the molecular characteristics of the compounds in the  
355 secretions may further our understanding their functional role, such as freeze tolerance or  
356 protection against other stresses (Gershenzon and Dudareva, 2007; Schillmiller et al., 2008;  
357 Huchelmann et al., 2017; Liu et al., 2019). Other studies have found that trichome secretions  
358 can serve as pathogen defenses based on antifungal, antibiotic, and antithrombotic properties  
359 (Dos Santos Tozin and Rodrigues, 2017; Haratym and Weryszko-Chmielewska, 2017;  
360 Tissier et al., 2017; Liu et al., 2019), or provide protection against UV light and other abiotic  
361 stresses (Liu et al., 2019). Additional analyses are needed to determine the specific functional  
362 role of these compounds in *M. tilingii* and *M. lewisii*.

363

364 The similarities between the species studied here include the trichome structural type, general  
365 morphology, and secretion chemistry. *Mimulus lewisii* and *M. tilingii* are exposed to similar  
366 environmental stresses found in montane environments, such as below-freezing temperatures  
367 and high UV light (Körner, 2003; Wu et al., 2008; Baldwin et al., 2012). Therefore, these



368 trichomes might serve as a physical barrier to prevent intracellular ice formation by creating  
369 an air space between the trichome heads and the epidermis, forming an insulation layer to  
370 protect the leaves (Azocar et al., 1988; Zhen and Ungerer, 2008; Li et al., 2018). In addition,  
371 the lipids produced by these glandular trichomes may serve as a hydrophobic layer that  
372 reduces the accumulation of water on the adaxial leaf surface, further limiting freezing within  
373 the epidermal tissue. Minimizing the damage from cold temperatures that may occur late in  
374 the spring or early in the fall could potentially extend the reproductive period (Körner, 2003).  
375 Since *M. lewisii* and *M. tilingii* have similar trichome structures and chemistry, yet belong to  
376 different species complexes within the genus (Beardsley et al., 2004), these trichome  
377 characteristics could reflect convergent evolution in response to common environmental  
378 pressures.

379

## 380 **5. Conclusions**

381 The results of this work suggest that trichomes of the montane species *Mimulus lewisii* and  
382 *M. tilingii* may have converged to a similar form and function in response to shared  
383 environmental conditions that characterize their natural range across western North America.  
384 Both species have the same type VI glandular trichomes and almost no non-glandular leaf  
385 trichomes. The main components of the secretory products from both species were identified  
386 as lipids and polysaccharides, with possibly additional terpenoid compounds. A study of the  
387 environmental factors these species face will be necessary to determine the functional role of  
388 these convergent structures.

389

## 390 **Acknowledgements**

391 This work was supported by funds from the University of Richmond, Richmond, VA.  
392 We thank W. John Hayden for helpful comments on an early draft of the manuscript and  
393 assistance with microscopy. We also thank Christine Lacy for her assistance with  
394 microscopy.

395

## 396 **References**

397 Abrams, L., 1984. Illustrated Flora in the Pacific States, vol. III. Stanford University Press,  
398 Stanford, CA, pp. 709-710.

399 Agren, J., Schemske, D.W., 1993. The cost of defense against herbivores: an experimental  
400 study of trichome production in *Brassica rapa*. *Am. Nat.* 141, 338–350.  
401 <https://doi.org/10.1086/285477>.

402 Asai, T., Nakamura, Y., Hirayama, Y., Ohyama, K., Fujimoto, Y., 2012. Cyclic glycolipids  
403 from glandular trichome exudates of *Cerastium glomeratum*. *Phytochemistry* 82, 149–  
404 157. <https://doi.org/10.1016/j.phytochem.2012.07.001>.

405 Ascensão, L., Marques, N., Pais, M.S., 1995. Glandular trichomes on vegetative and  
406 reproductive organs of *Leonitis leonorus* (Lamiaceae). *Ann. Bot.* 75, 619–626.  
407 <https://doi.org/10.1006/anbo.1995.1067>.

408 Ascensão, L., Marques, N., Pais, M.S., 1997. Peltate glandular trichomes of *Leonitis*  
409 *leonorus* leaves: Ultrastructure and histochemical characterization of secretions. *Int. J.*  
410 *Plant Sci.* 158, 249–258. <https://doi.org/10.1086/297436>.

- 411 Ascensão, L., Pais, M.S., 1998. The leaf capitate trichomes of *Leonotis leonurus*:  
412 histochemistry, ultrastructure, secretion. *Ann.Bot.* 81, 263–271.  
413 <https://doi.org/10.1006/anbo.1997.0550>.
- 414 Azocar, A., Rada, F., Goldstein, G., 1988. Freezing tolerance in *Draba chionophila*, a  
415 ‘miniature’ caulescent rosette species. *Oecologia* 75, 156–160.  
416 <https://doi.org/10.1007/BF00378830>.
- 417 Baldwin, B.C., Goldman, D., Keil, D.J., Patterson, R., Rosatti, T.J., Wilken D., 2012. The  
418 Jepson Manual: Vascular Plants of California. University of California Press,  
419 Berkeley, CA.
- 420 Barker, W.R., Nesom, G.L., Beardsley, P.M., Fraga, N.S., 2012. A taxonomic conspectus of  
421 Phrymaceae: A narrowed circumscription for *Mimulus*, new and resurrected genera,  
422 and new names and combinations. *Phytoneuron* 39, 1–60.  
423 <http://www.phytoneuron.net/PhytoN-Phrymaceae.pdf>.
- 424 Beardsley, P.M., Schoenig, S.E., Whittall, J.B., Olmstead, R.G., 2004. Patterns of evolution  
425 in western North American *Mimulus* (Phrymaceae). *Am. J. Bot.* 91, 474–489.  
426 <https://doi.org/10.3732/ajb.91.3.474>.
- 427 Bergau N., Bennewitz, S., Syrowatka, F., House, G., Tissier. A., 2015. The development of  
428 type VI glandular trichomes in the cultivated tomato *Solaum lycopersicum* and a  
429 related wild species *S. habrochaites*. *BMC Plant Biol.* 15, 289.  
430 <https://doi.org/10.1186/s12870-015-0678-z>.
- 431 Bohm, B.A. 1992. Exudate flavonoids of *Mimulus lewisii*. *Biochem. Syst. Ecol.* 20, 591.  
432 [https://doi.org/10.1016/0305-1978\(92\)90015-6](https://doi.org/10.1016/0305-1978(92)90015-6).

- 433 Channarayappa, S.G., Muniyappa, V., Frist, R.H., 1992. Resistance of *Lycopersicon* species  
434 to *Bemisia tabaci*, a tomato leaf curl virus vector. *Can. J. Bot.* 70, 2184–2192.  
435 <https://doi.org/10.1139/b92-270>.
- 436 Cho, K.S., Kwon, M., Cho, J.H., Im, J.S., Park, Y.E., Hong, S.Y., Hwang, I.T., Kang, J.H.,  
437 2017. Characterization of trichome morphology and aphid resistance in cultivated and  
438 wild species of potato. *Hortic. Environ. Biotechnol.* 58, 450–457.  
439 <https://doi.org/10.1007/s13580-017-0078-4>.
- 440 Clark, G., 1981. *Staining Procedures*, 4<sup>th</sup> edn. Williams and Wikins, Baltimore.
- 441 Combrinck, S., Du Plooy, G.W., McCrindle, R.I., Botha, B.M., 2007. Morphology and  
442 histochemistry of the glandular trichomes of *Lippia scaberrima* (Verbenaceae). *Ann.*  
443 *Bot.* 99, 1111–1119. <https://doi.org/10.1093/aob/mcm064>.
- 444 Dalin, P., Ågren, J., Björkman, C., Huttunen, P., Kärkkäinen, K., 2008. Leaf trichome  
445 formation and plant resistance to herbivory, in: *Induced plant resistance to herbivory*,  
446 Springer, Dordrecht, pp. 89-105.
- 447 Dos Santos Tozin, L.R., Rodrigues, T.M., 2017. Morphology and histochemistry of glandular  
448 trichomes in *Hyptis villosa* Phol ex Benth. (Lamiaceae) and differential labeling of  
449 cytoskeletal elements. *Acta Bot. Bras.* 31, 330–343. [http://dx.doi.org/10.1590/0102-](http://dx.doi.org/10.1590/0102-33062016abb0292)  
450 [33062016abb0292](http://dx.doi.org/10.1590/0102-33062016abb0292).
- 451 Ehleringer, J., 1984. Ecology and ecophysiology of leaf pubescence in North American  
452 desert plants, in: Rodrigues, E. Healey, P.L., Mehta, I. (Eds.), *Biology and chemistry*  
453 *of plant trichomes*. Plenum, New York, pp. 113–132.

- 454 Elle, E., Hare, J.D., 2000. No benefit of glandular trichome production in natural populations  
455 of *Datura wrightii*? *Oecologia* 123, 57–63. <https://doi.org/10.1007/s004420050989>.
- 456 Fishman, L., Willis, J.H., Wu, C.A., Lee, Y.W., 2014. Comparative linkage maps suggest  
457 that fission, not polyploidy, underlies near-doubling of chromosome number within  
458 monkeyflowers (*Mimulus*; Phrymaceae). *Heredity* 112, 562–568.  
459 <https://doi.org/10.1038/hdy.2013.143>.
- 460 Greene, E.L., 1895. *Mimulus luteus* and some of its allies. *J. of Bot.* 33, 4-8.
- 461 Gabe, M., 1968. *Techniques Histologiques*. Masson, Paris.
- 462 Gershenzon, J., Dudareva, N., 2007. The function of terpene natural products in the natural  
463 world. *Nat. Chem. Biol.* 3, 408–414. <https://doi.org/10.1038/nchembio.2007.5>.
- 464 Glas, J.J., Schimmel, B.C., Alba, J.M., Escobar-Bravo, R., Schuurink, R.C., Kant, M.R.,  
465 2012. Plant glandular trichomes as targets for breeding or engineering of resistance to  
466 herbivores. *Int. J. Mol. Sci.* 13, 17077–17103. <https://doi.org/10.3390/ijms131217077>.
- 467 Gravano, E., Tani, C., Bennici, A., Gucci, R., 1998. The ultrastructure of glandular trichomes  
468 of *Phillyrea latifolia* L. (Oleaceae) leaves. *Ann. Bot.* 81, 327–335.  
469 <https://doi.org/10.1006/anbo.1997.0562>.
- 470 Handley, R., Ekbom, B., Agren, J., 2005. Variation in trichome density and resistance against  
471 a specialist insect herbivore in natural populations of *Arabidopsis thaliana*. *Ecol. Ento.*  
472 30, 284–292. <https://doi.org/10.1111/j.0307-6946.2005.00699.x>.

- 473 Haratym, W., Weryszko-Chmielewska, E., 2017. Ultrastructural and histochemical analysis  
474 of glandular trichomes of *Marriubium vulgare* L. (Lamiaceae). *Flora* 231, 11–20.  
475 <https://doi.org/10.1016/j.flora.2017.04.001>.
- 476 Hawes, C.R., Satiat-Jeunemaitre, B., 1996. Stacks of questions - How does the plant Golgi  
477 work? *Trends Plant Sci.* 1, 395–401. [https://doi.org/10.1016/S1360-1385\(96\)80315-3](https://doi.org/10.1016/S1360-1385(96)80315-3).
- 478 Hiesey, W.M., Nobs, M.A., Björkman, O., 1971. Experimental studies on the nature of  
479 species. V. Biosystematics, genetics, and physiological ecology of the Erythranthe  
480 section of *Mimulus*. Carnegie Institute of Washington, Washington, D.C.  
481 <https://doi.org/10.1086/407263>.
- 482 Holeski, L.M., 2007. Within and between generation phenotypic plasticity in trichome  
483 density of *Mimulus guttatus*. *J. Evol. Biol.* 20, 2092–2100.  
484 <https://doi.org/10.1111/j.1420-9101.2007.01434.x>.
- 485 Holeski, L.M., Chase-Alone, R., Kelly, J.K., 2010. The genetics of phenotypic plasticity in  
486 plant defense: Trichome production in *Mimulus guttatus*. *Am. Nat.* 175, 391–400.  
487 <https://doi.org/10.1086/651300>.
- 488 Holeski, L.M., Keefover-Ring, K., Bowers, M.D., Harnenz, Z.T., Lindroth, R.L., 2013.  
489 Patterns of phytochemical variation in *Mimulus guttatus* (yellow monkeyflower). *J.*  
490 *Chem. Ecol.* 39, 525–536. <https://doi.org/10.1007/s10886-013-0270-7>.
- 491 Horgan, F.G., Quiring, D.T., Lagnaoui, A., Pelletier, Y., 2009. Effects of altitude of origin on  
492 trichome-mediated anti-herbivore resistance in wild Andean potatoes. *Flora* 204, 49–  
493 62. <https://doi.org/10.1016/j.flora.2008.01.008>.

- 494 Huchelmann, A., Bountry, M., Hachez, C., 2017. Plant glandular trichomes: Natural cell  
495 factories of high biotechnological interest. *Plant Phys.* 175, 6–22.  
496 <https://doi.org/10.1104/pp.17.00727>.
- 497 Huttunen, P., Kärkkäinen, K., Løe, G., Rautio, P., Ågren, J. 2010. Leaf trichome production  
498 and responses to defoliation and drought in *Arabidopsis lyrata* (Brassicaceae). *Ann.*  
499 *Bot. Fenn.* 47, 199-208. <https://doi.org/10.5735/085.047.0304>.
- 500 Jensen, W.A., 1962. *Botanical Histochemistry Principles and Practice*, 1<sup>st</sup> edn. WH Freeman  
501 and Company, San Francisco.
- 502 Johansen, D.A., 1940. *Plant Microtechnique*, 1<sup>st</sup> edn. McGraw Hill, New York, London.
- 503 Kang, J., Shi, F., Jones, A.D., Marks, M.D., Howe, G.A., 2010. Distortion of trichome  
504 morphology by the hairless mutation of tomato affects leaf surface chemistry. *J. Exp.*  
505 *Bot.* 61, 1053–1064. <https://doi.org/10.1093/jxb/erp370>.
- 506 Kärkkäinen, K., Ågren, J., 2002. Genetic basis of trichome production in *Arabidopsis lyrata*.  
507 *Hereditas* 136 : 219–226. <https://doi.org/10.1034/j.1601-5223.2002.1360307.x>.
- 508 Keefover-Ring, K., Holeski, L.M., Bowers, M.D., Clauss, A.D., Lindroth, R.L., 2014.  
509 Phenylpropanoid glycosides of *Mimulus guttatus* (yellow monkeyflower).  
510 *Phytochemistry* 10, 132–139. <https://doi.org/10.1016/j.phytol.2014.08.016>.
- 511 Khokhar, A.L., Rajput, M.T., Tahir, S.S., 2012. Taxonomic study of the trichomes in the  
512 some members of the genus *Convolvulus* (Convolvulaceae). *Pak. J. Bot.* 44, 1219–  
513 1224. [https://www.pakbs.org/pjbot/PDFs/44\(4\)/08.pdf](https://www.pakbs.org/pjbot/PDFs/44(4)/08.pdf).

- 514 Kofidis, G., Bosabalidis, A.M., 2008. Effects of altitude and season on glandular hairs and  
515 leaf structural traits of *Nepeta nuda* L. Bot. Stud. 49, 363–372.  
516 <http://ejournal.sinica.edu.tw/bbas/content/2008/4/Bot494-08/>.
- 517 Körner, C., 2003. Alpine Plant Life: Functional Plant Ecology of High Mountain  
518 Ecosystems. Springer, Berlin.
- 519 Larcher, W., 2001. Physiological plant ecology. Springer, Berlin.
- 520 Levin, D.A., 1973. The role of trichomes in plant defense. Q. Rev. Biol. 48, 3–15.  
521 <https://www.jstor.org/stable/2822621>.
- 522 Li, Q., Grossenbacher, D.L., Angert, A.L., 2018. The effect of range overlap on ecological  
523 niche divergence depends on spatial scale in monkeyflowers. Evolution 72, 2100–  
524 2113. <https://doi.org/10.1111/evo.13567>.
- 525 Lison, L., 1960. Histochemie et cytochemie animals. Principes et méthodes, v.1. 2. Gauthier-  
526 Villars, Paris.
- 527 Liu, Y., Jing, S.H., Luo, S.H., Li, S.H., 2019. Non-volatile natural products in plant glandular  
528 trichomes: chemistry, biological activities and biosynthesis. Nat. Prod. Rep. 36, 626–  
529 665. <https://doi.org/10.1039/C8NP00077H>.
- 530 Lowry, D.B., Sobel, J.M, Angert, A.L., Ashman T.L., Baker, R.L., Blackman, B.K.,  
531 Brandvain, Y., Byers, K.J.R.P., Cooley, A.M., Coughlan, J.M., Dudash, M.R., Fenster,  
532 C.B., Ferris, K.G., Fishman, L., Friedman, J., Grossenbacher, D.L., Holeski, L.M.,  
533 Ivey, C.T., Kay, K.M., Koelling, V.A., Kooyers, N.J., Murren, C.J., Muir, C.D.,  
534 Nelson, T.C., Peterson, M.L., Puzey, J.R., Rotter, M.C., Seemann, J.R., Sexton, J.P.,



- 535 Sheth, S.N., Streisfeld, M.A., Sweigart, A.L., Twyford, A.D., Vallejo-Marín, M.,  
536 Willis, J.H., Wright, K.M., Wu, C.A., Yuan, Y.W., 2019. The case for the continued  
537 use of the genus name *Mimulus* for all monkeyflowers. *Taxon* (In press).  
538 <https://doi.org/10.1002/tax.12122>.
- 539 Luckwill, L.C., 1943. The genus *Lycopersicon*: A historical, biological and taxonomic survey  
540 of the wild and cultivated tomato. *Aberd. Univ. Stud.* 120, 1–44.
- 541 Malakar, R., Tingey, W.M., 2000. Glandular trichomes of *Solanum berthaultii* and its  
542 hybrids with potato deter oviposition and impair growth of potato tuber moth.  
543 *Entomologia Experimentalis et Applicata* 94, 249–257. [https://doi.org/10.1046/j.1570-](https://doi.org/10.1046/j.1570-7458.2000.00627.x)  
544 [7458.2000.00627.x](https://doi.org/10.1046/j.1570-7458.2000.00627.x).
- 545 Meira, R.M.S.A., Francino, D.M.T., Ascensão, L., 2014. Oleoresin trichomes of  
546 *Chamaecrista dentata* (Leguminosae): Structure, function, and secretory products. *Int.*  
547 *J. Plant Sci.* 175, 336–345. <https://doi.org/10.1086/673538>.
- 548 Mershon, J.P., Becker, M., Bickford, C.P., 2015. Linkage between trichome morphology and  
549 leaf optical properties in New Zealand alpine *Pachycladon* (Brassicaceae). *New Zeal.*  
550 *J. Bot.* 53, 175–182. <https://doi.org/10.1080/0028825X.2015.1042486>.
- 551 Muravnik, L.E., Kostina, O.V., Mosina, A.A., 2019. Glandular trichomes of the leaves in  
552 three *Doronicum* species (Senecioneae, Asteraceae): Morphology, histochemistry, and  
553 ultrastructure. *Protoplasma* 256, 789–803. [https://doi.org/10.1007/s00709-018-01342-](https://doi.org/10.1007/s00709-018-01342-2)  
554 [2](https://doi.org/10.1007/s00709-018-01342-2).

- 555 Nie, Z.L., Sun, H., Beardsley, P.M., Olmstead, R.G., Wen, J., 2006. Evolution of  
556 biogeographic disjunction between eastern Asia and eastern North America in Phryma  
557 (Phrymaceae). *Am. J. Bot.* 93: 1343–1356. <https://doi.org/10.3732/ajb.93.9.1343>.
- 558 Rodriguez, A.M., Derita, M.G., Borkosky, S.A., Socolsky, C., Bardón, A., Hernández M.A.,  
559 2018. Bioactive farina of *Notholaena sulphurea* (Pteridaceae): Morphology and  
560 histochemistry of glandular trichomes. *Flora* 240, 144–151.  
561 <https://doi.org/10.1016/j.flora.2018.01.008>.
- 562 Payne, W., 1973. A glossary of plant hair terminology. *Brittonia* 30, 239–255.  
563 <https://doi.org/10.2307/2806659>.
- 564 Schemske, D.W., Bradshaw, H.D., 1999. Pollinator preference and the evolution of floral  
565 traits in monkeyflowers (*Mimulus*). *Proc. Natl. Acad. Sci. U.S.A.* 96, 11910–11915.  
566 <https://doi.org/10.1073/pnas.96.21.11910>.
- 567 Schnepf, E., Busch, J., 1976. Morphology and kinetics of slime secretion in glands of  
568 *Mimulus tilingii*. *Z. Pflanzenphysiol.* 79, 62–71. [https://doi.org/10.1016/S0044-](https://doi.org/10.1016/S0044-328X(76)80077-3)  
569 [328X\(76\)80077-3](https://doi.org/10.1016/S0044-328X(76)80077-3).
- 570 Schillmiller, A.L., Last, R.L., Pichersky, E., 2008. Harnessing plant trichome biochemistry  
571 for the production of useful compounds. *Plant J.* 54, 702–711.  
572 <https://doi.org/10.1111/j.1365-313X.2008.03432.x>.
- 573 Schindelin, J., Arganda-Carreras, I., Frise, E., Kaynig, V., Longair, M., Pietzsch, T.,  
574 Preibisch, S., Rueden, C., Saalfeld, S., Schmid, B., Tinevez, J.Y., White, D.J.,  
575 Hartenstein, V., Eliceiri, K., Tomancak, P., Cardona, A., 2012. Fiji: An open-source

- 576 platform for biological-image analysis. *Nature Methods* 9, 676–682.
- 577 <https://doi.org/10.1038/nmeth.2019>.
- 578 Serrato-Valenti, G., Bisio, A., Cornara, L., Ciarallo., G., 1997. Structural and histochemical  
579 investigation of the glandular trichomes of *Salvia aurea* L. leaves, and chemical  
580 analysis of the essential oil. *Ann. Bot.* 79, 329–336.
- 581 <https://doi.org/10.1006/anbo.1996.0348>.
- 582 Talbot, M.J., White, R.G., 2013. Methanol fixation of plant tissue for scanning electron  
583 microscopy improves preservation of tissue morphology and dimensions. *Plant*  
584 *Methods* 9, 36. <https://doi.org/10.1186/1746-4811-9-36>.
- 585 Theobald, W.L., Krahulik, J.L., Rollins, R.C., 1979. Trichome description and classification,  
586 in: Metcalfe, C.R., Chalk, L. (Eds.), *Anatomy of Dicotyledons*. Oxford, pp. 40–53.
- 587 Tissier, A., Morgan, J.A., Dudareva, N., 2017. Plant volatiles: Going ‘in’ but not ‘out’ of  
588 trichome cavities. *Trends Plant Sci.* 22, 930–938.
- 589 <https://doi.org/10.1016/j.tplants.2017.09.001>.
- 590 Tozin, L.R.S., Marques, M.O.M., Rodrigues, T.M., 2015. Glandular trichome density and  
591 essential oil composition in leaves and inflorescences of *Lippia origanoides* Kunth  
592 (Verbenaceae) in the Brazilian Cerrado. *An. Acad. Bras. Cienc.* 87, 943–53.
- 593 <https://doi.org/10.1590/0001-3765201520140376>.
- 594 Tuchstone, J.C., 1992. *Practice of Thin Layer Chromatography*, third ed. Hoboken, New  
595 Jersey.

- 596 Vassilyev, A.E., 2000. Quantitative ultrastructural data of secretory duct epithelial cells in  
597 *Rhus toxicodendron*. Int. J. Plant Sci. 161, 615–630. <https://doi.org/10.1086/314288>.
- 598 Wagner, G.J., 1991. Secreting glandular trichomes: More than just hairs. Plant Physiol. 96,  
599 675–679. <https://doi.org/10.1104/pp.96.3.675>.
- 600 Wagner, G. J., Wang, E., & Shepherd, R. W. 2004. New approaches for studying and  
601 exploiting an old protuberance, the plant trichome. Ann. Bot. 93, 3–11.  
602 <https://doi.org/10.1093/aob/mch011>.
- 603 Werker, E., Putievsky, E., Ravid, U., Dudai, N., Katzir, I., 1993. Glandular hairs and  
604 essential oil in developing leaves of *Ocimum basilicum* L. (Lamiaceae). Ann. Bot. 71,  
605 43–50. <https://doi.org/10.1006/anbo.1993.1005>.
- 606 Werker, E., 2000. Trichome diversity and development. Adv. Bot. Res. 31, 1–35.  
607 [https://doi.org/10.1016/S0065-2296\(00\)31005-9](https://doi.org/10.1016/S0065-2296(00)31005-9).
- 608 Wilkens, R., Shea, G., Halbreich, S., Stamp, N., 1996. Resource availability and the trichome  
609 defenses of tomato plants. Oecologia 106, 181–191.  
610 <http://www.jstor.org/stable/4221246>.
- 611 Wollenweber, E., Schneider, J., 2000. Lipophilic exudates of Pteridaceae – Chemistry and  
612 chemotaxonomy. Biochem. Syst. Ecol. 28, 751–777. [https://doi.org/10.1016/S0305-1978\(99\)00118-0](https://doi.org/10.1016/S0305-1978(99)00118-0).
- 614 Wu, C.A., Lowry, D.B., Cooley, A.M., Wright, K.M., Lee, Y.W., Willis, J.H., 2008.  
615 *Mimulus* is an emerging model system for the integration of ecological and genomic  
616 studies. Heredity 100, 220–230. <https://doi.org/10.1038/sj.hdy.6801018>.

- 617 Wu, C.A., Streisfeld, M.A., Nutter, L.I., Cross, K., 2013. The genetic basis of a rare flower  
618 color polymorphism in *Mimulus lewisii* provides insight into the repeatability of  
619 evolution. PLoS ONE 8, e81173. <https://doi.org/10.1371/journal.pone.0081173>.
- 620 Yang, X.W., Feng, L., Li, S.M., Liu, X.H., Li, Y.L., Wu L., Shen, Y.H., Tian, J.M., Zhang,  
621 X., Liu, X.R., Wang, N., Liu, Y., Zhang, W.D., 2010. Isolation, structure, and  
622 bioactivities of abiesadines a–y, 25 new diterpenes from *Abies georgei* Orr. Bioorg.  
623 Med. Chem. 18, 744–754. <https://doi.org/10.1016/j.bmc.2009.11.055>.
- 624 Yuan, Y.W., Sagawa, J.M., Di Stilio, V.S., Bradshaw Jr., H.D., 2013. Bulk segregant  
625 analysis of an induced floral mutant identifies a MIXTA-like R2R3 MYB controlling  
626 nectar guide formation in *Mimulus lewisii*. Genetics 194, 523–528.  
627 <https://doi.org/10.1534/genetics.113.151225>.
- 628 Zhang, X., Thacker, R.R., Snyder, J.C., 2008. Occurrence of 2, 3-dihydrofarnesoic acid, a  
629 spidermite repellent, in trichome secretions of *Lycopersicon esculentum* x *L. hirsutum*  
630 hybrids. Euphytica 162, 1–9. <https://doi.org/10.1007/s10681-007-9489-0>.
- 631 Zhen, Y., Ungerer, M.C., 2008. Clinal variation in freezing tolerance among natural  
632 accessions of *Arabidopsis thaliana*. New Phytol. 177, 419–427.  
633 <https://doi.org/10.1111/j.1469-8137.2007.02262.x>.
- 634

635 **Figures**

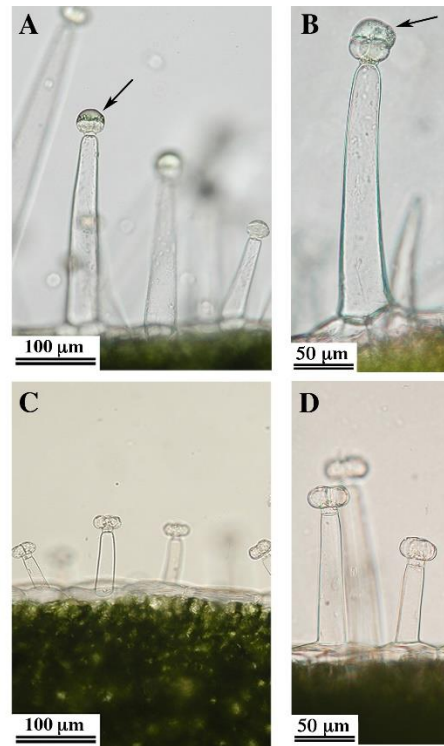

636

637 **Fig. 1.** Long-stalk-multicelled glandular trichomes found on leaf surfaces of both *Mimulus*  
638 *lewisii* and *M. tilingii* visualized by light microscopy. The stalk cell length varies in *M. lewisii*  
639 (A, B) trichomes, but remains relatively constant in *M. tilingii* (C, D) trichomes. Trichomes on  
640 both species have a single-celled stalk, a neck cell, and a multicellular head that is surrounded by  
641 the secretions, corresponding to type VI trichome. The glandular secretions (A,B) the head of *M.*  
642 *lewisii* trichomes are indicated by arrows. Note the scalebars.

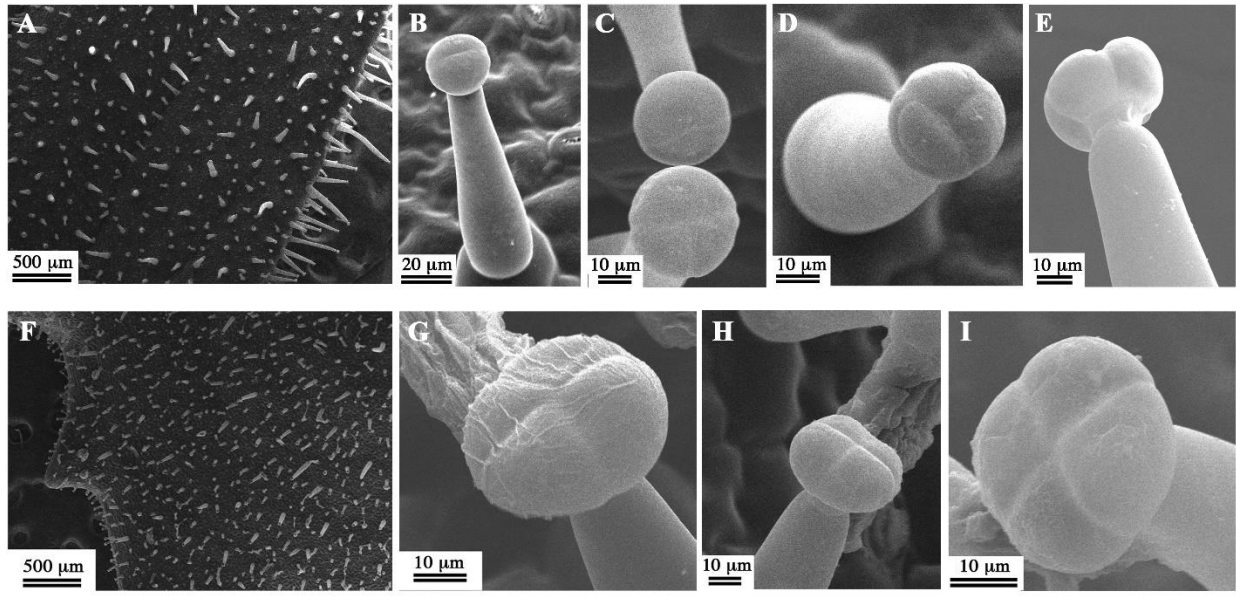

643

644 **Fig. 2.** Morphology of *Mimulus lewisii* (A-E) and *M. tilingii* (F-I) glandular trichomes visualized  
645 by SEM consistent with type VI capitate glandular trichomes that have a single-cell stalk, a neck  
646 cell, and multicellular heads. Both, *M. lewisii* (A) and *M. tilingii* (F), have evenly distributed  
647 trichomes in adaxial (shown) and abaxial (not shown) leaf surfaces. The stalk cells are the main  
648 source of height variability among all the trichomes in *Mimulus*. Although bicellular trichome  
649 heads (B-C) are the most common type VI trichome structure present in *M. lewisii*, tricellular (C-  
650 D) and tetracellular glandular heads (E) were also observed in a single plane. The glandular  
651 trichomes of *M. tilingii* had only tetracellular glandular heads (G-I) in a similar planar structure.  
652 The secretions of *M. tilingii* trichomes are visible after the cuticle has been removed (G). Note  
653 scalebar differences among panels.



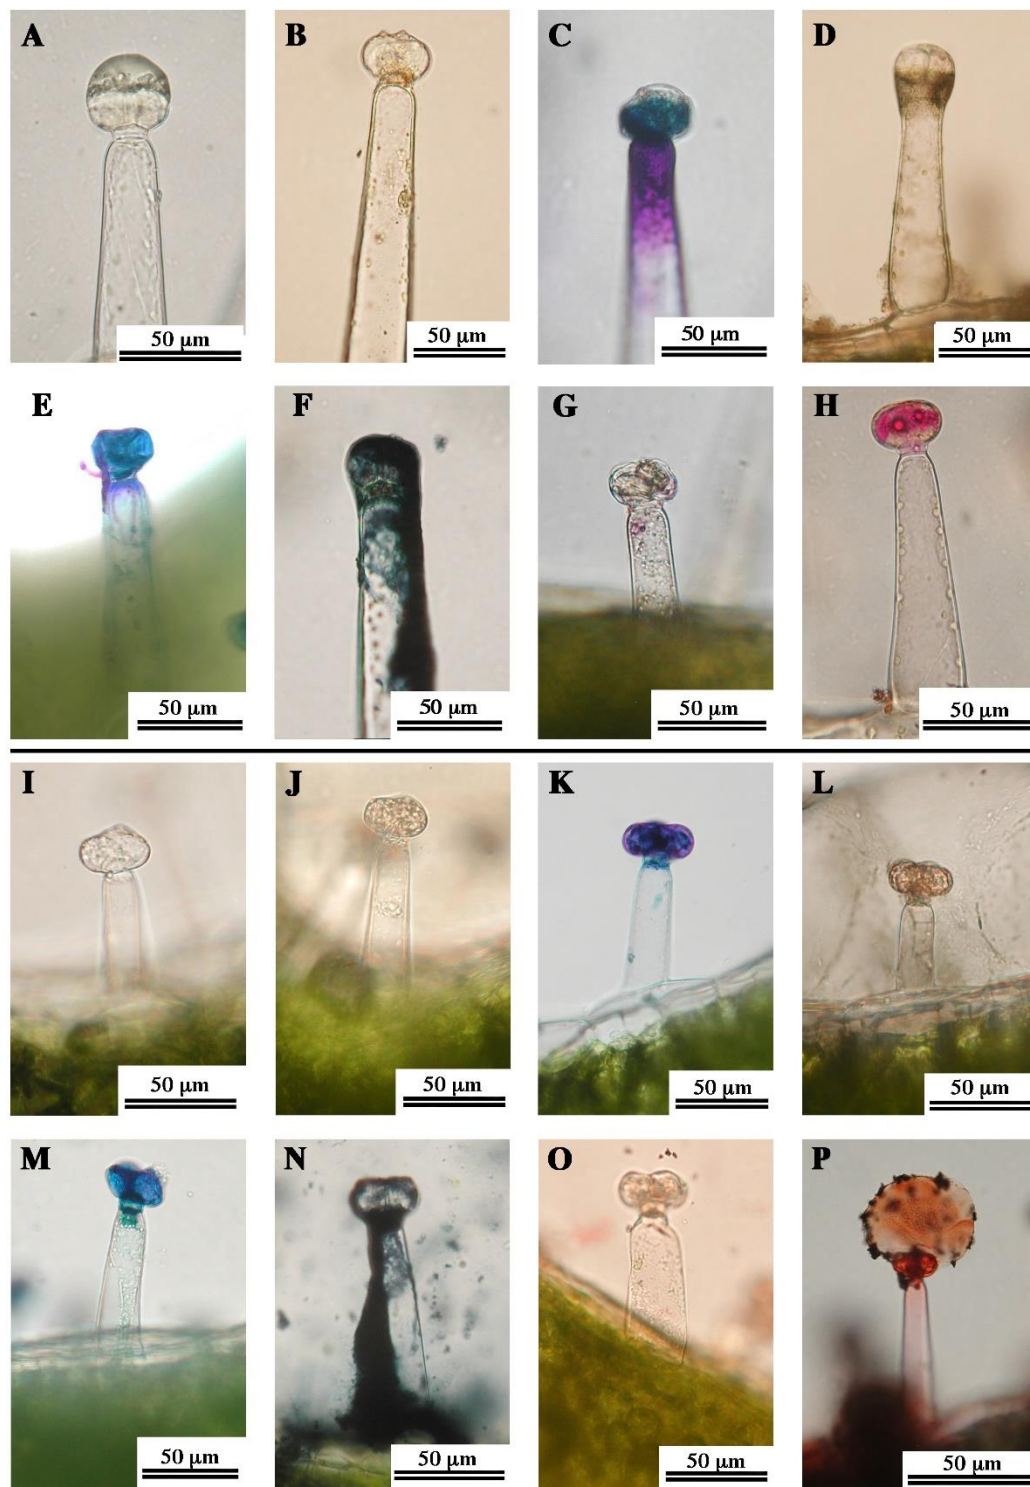

654

655 **Fig. 3.** Histochemical characterization of secretions of *Mimulus lewisii* (A-H) and *M. tilingii* (I-  
656 P) visualized by light microscopy. The main classes of metabolites in the resins of both species



657 were investigated using fresh leaf sections with seven histochemical tests, using protocols  
658 modified from Haratym and Weryszko-Chmielewska (2017). Unstained *M. lewisii* (A) and *M.*  
659 *tilingii* (I) capitate trichomes, with visible secretory glandular bicellular head, neck cell, and stalk  
660 cell. Staining with potassium chromate indicate a lack of tannins in trichomes of *M. lewisii* (B)  
661 and *M. tilingii* (J). Polysaccharides stained with Toluidine blue in the stalk cell and head cell of  
662 *M. lewisii* (C) and only the head cells of *M. tilingii* (K). Low relative abundance of  
663 polysaccharides stained with Ruthenium red was seen in *M. lewisii* (D) and *M. tilingii* (L)  
664 trichomes. Neutral lipids stained with Nile blue in the glandular head of *M. lewisii* (E) and *M.*  
665 *tilingii* (M). There is an abundant lipidic resin stained with Sudan Black B on the secretions of  
666 *M. lewisii* (F) and *M. tilingii* (N). Lower concentration of lipids in the resin stained with Sudan  
667 III in *M. lewisii* (G) and *M. tilingii* (O). Lipids stained with Neutral red in the glandular head of  
668 *M. lewisii* (H) and the subcuticular area and head cells of *M. tilingii* (P).

669 **Tables**

670 **Table 1**

671 Average trichome densities (mean  $\pm$  SEM trichome/mm<sup>2</sup>, n=12 leaves per species) of mature  
672 *Mimulus* leaf surfaces.

| <b>Leaf surface</b>     | <b><i>M. lewisii</i></b> | <b><i>M. tilingii</i></b> |
|-------------------------|--------------------------|---------------------------|
| Adaxial                 | 17.1 $\pm$ 1.87          | 36.34 $\pm$ 2.60          |
| Abaxial                 | 17.7 $\pm$ 1.30          | 34.6 $\pm$ 4.04           |
| Average across surfaces | 17.4 $\pm$ 1.17          | 35.5 $\pm$ 2.30           |

673

674 **Table 2**

675 Histochemical identification of compounds in the capitate type VI trichomes of *Mimulus lewisii*  
676 and *M. tilingii*. Staining responses summarized from Haratym and Weryszko-Chmielewska  
677 (2017). Representative images of staining results are shown in Figure 1.

| <b>Stain</b>         | <b>Compound</b> | <b>Color observed</b> | <b>Target response</b>   |                           |
|----------------------|-----------------|-----------------------|--------------------------|---------------------------|
|                      |                 |                       | <b><i>M. lewisii</i></b> | <b><i>M. tilingii</i></b> |
| Potassium dichromate | Tannins         | Brown                 | -                        | -                         |
| Toluidine Blue O     | Polysaccharides | Blue/purple           | +                        | +                         |
| Ruthenium Red        | Polysaccharides | Crimson               | (+)                      | (+)                       |
| Nile Blue            | Acid lipids     | Blue                  | +                        | +                         |
| Sudan Black B        | Lipids          | Dark blue             | +                        | +                         |
| Sudan III            | Lipids          | Orange                | -                        | -                         |
| Neutral Red          | Lipids          | Red                   | +                        | +                         |

678 '-' negative response, '(+)' subtle response, '+' positive response

679

680 **Table 3**

681 Functional group identification in compounds from the extracted secretions of *Mimulus lewisii*

682 and *M. tilingii* leaves using TLC plate staining, following methods from Tuchstone (1992).

| TLC plate treatment              | Compound                                    | Color observed  | Target response   |                    |
|----------------------------------|---------------------------------------------|-----------------|-------------------|--------------------|
|                                  |                                             |                 | <i>M. lewisii</i> | <i>M. tilingii</i> |
| UV light only                    | Any short wave UV response                  | Dark blue       | +                 | +                  |
| Vanillin-sulfuric acid           | Alcohols, ketones, bile acids, and steroids | Brown           | +                 | (+)                |
| Phosphomolybdic acid             | Steroids, lipids, antioxidants              | Blue            | +                 | +                  |
| Cerium ammonium molybdate        | Polyalcohols                                | Dark blue       | +                 | +                  |
| Potassium permanganate           | Alkenes, alkynes, alcohols, and amines      | Brown           | +                 | +                  |
| P-anisaldehyde                   | Sugars                                      | Dark blue/brown | +                 | +                  |
| Ninhydrin                        | Amines                                      | Yellow          | (+)               | (+)                |
| Diphenylamine in EtOH            | Nitrate esters                              | Yellow          | (+)               | (+)                |
| Copper(II) sulfate               | Sulfur containing glycosides                | Brown           | (+)               | (+)                |
| 2,4-Dinitrophenylhydrazine (DNP) | Aldehydes and ketones                       | Orange          | +                 | +                  |

683 '-' negative response, '(+)' subtle response, '+' positive response
